# Supplementary material
Source: PubMed Central journal article supplement (PMC7255762)
Supplement: NIHMS1590811-supplement-SI_pdf.pdf [file NIHMS1590811-supplement-SI_pdf.pdf]

## Supporting Information

### Electrical impedance characterization of erythrocyte response to cyclic hypoxia in sickle cell disease

Jia Liu<sup>a</sup>, Yuhao Qiang<sup>a</sup>, Ofelia Alvarez<sup>b</sup>, E Du<sup>a\*</sup>

<sup>a</sup> Department of Ocean and Mechanical Engineering, Florida Atlantic University, Boca Raton, FL 33431, USA

<sup>b</sup> Division of Pediatric Hematology and Oncology, University of Miami, Miami, FL 33136, USA

email: [edu@fau.edu](mailto:edu@fau.edu)

#### Table of contents

Table S-1. Summary of results from complete blood count, hemoglobin electrophoresis and the sickled fractions from morphology measurement.

Figure S-1. Normalized values of mean cell area  $\bar{A}$ , impedance resistance  $\bar{R}$  and absolute impedance reactance  $|\bar{X}|$  as a function of time within the (a) second, (b) third and (c) fourth hypoxia-normoxia cycle.

Figure S-2. Normalized values of impedance resistance,  $\bar{R}$  and absolute impedance reactance,  $|\bar{X}|$  as a function of time within the (a) second, (b) third and (c) fourth hypoxia session.

Figure S-3. Electrical impedance modelling of sickle cell suspension with (a) a complete equivalent circuit model and (b) a simplified circuit model.

**Table S-1.** Summary of results from complete blood count, hemoglobin electrophoresis and the sickled fractions from morphology measurement.

| <i>Variables</i>            | <i>ss1</i> | <i>ss2</i> | <i>ss3</i> | <i>ss4</i> | <i>ss5</i> |
|-----------------------------|------------|------------|------------|------------|------------|
| <i>MCV (fL)</i>             | 81.6       | 101.9      | 91.9       | 95.7       | 108.1      |
| <i>MCH (pg)</i>             | 29.1       | 37.4       | 33.7       | 33.8       | 38.9       |
| <i>MCHC (g/dL)</i>          | 35.7       | 36.7       | 36.7       | 35.3       | 36.0       |
| <i>Hgb A (%)</i>            | 0          | 0          | 0          | 13.6       | 0          |
| <i>Hgb A2 (%)</i>           | 3.0        | 2.6        | 3.0        | 3.4        | 2.8        |
| <i>Hgb F (%)</i>            | 17.4       | 23.2       | 20.3       | 14.2       | 24.2       |
| <i>Hgb S, D, Q (%)</i>      | 79.6       | 74.2       | 76.7       | 68.8       | 73.0       |
| <i>Sickled fraction (%)</i> | 95.8±3.0   | 93.1±2.3   | 91.6±3.6   | 95.1±1.6   | 95.1±3.3   |

MCV: Mean corpuscular volume; MCH: Mean corpuscular haemoglobin; MCHC: Mean corpuscular hemoglobin concentration; Hgb: hemoglobin.

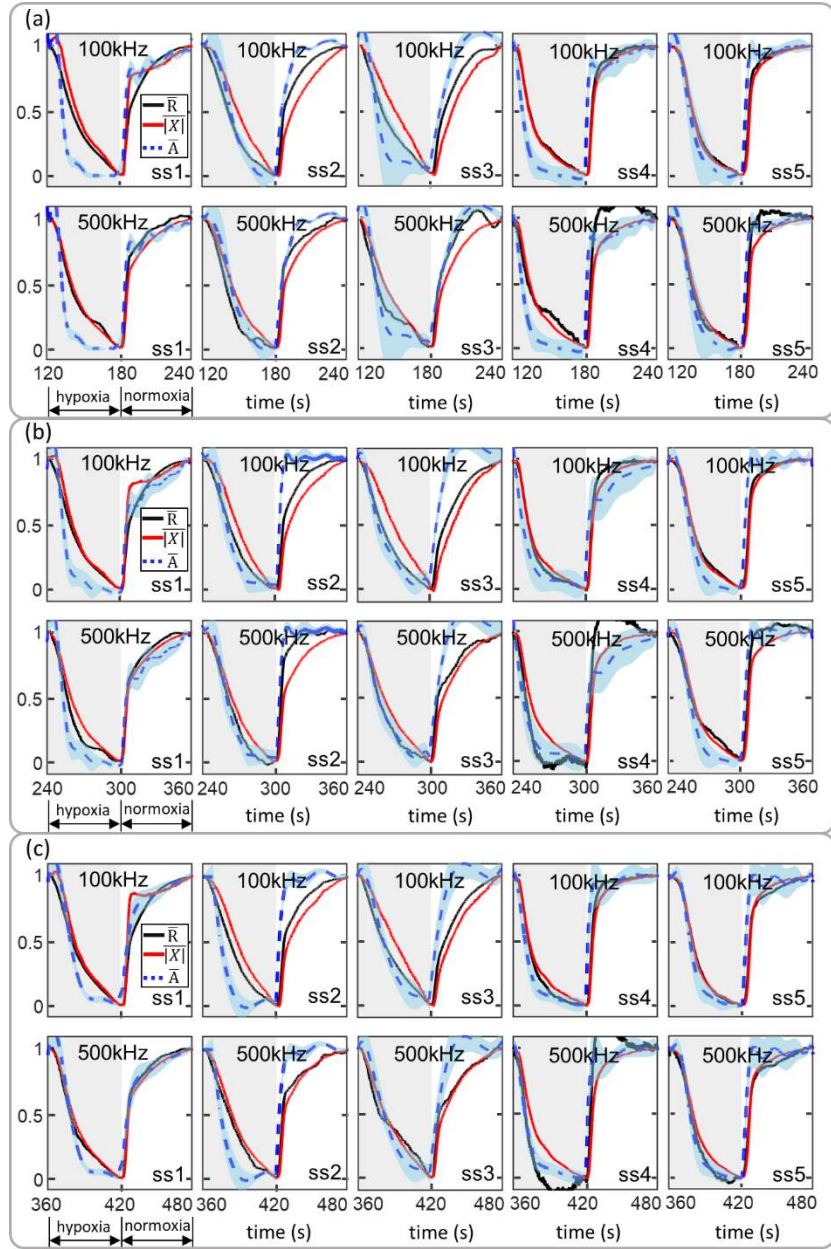

**Figure S-1.** Normalized values of mean cell area  $\bar{A}$  (blue dashed curve) with standard deviation (light blue shading), impedance resistance  $\bar{R}$  (black curve) and absolute impedance reactance  $|\bar{X}|$  (red curve) as a function of time within the (a) second, (b) third and (c) fourth hypoxia-normoxia cycle.

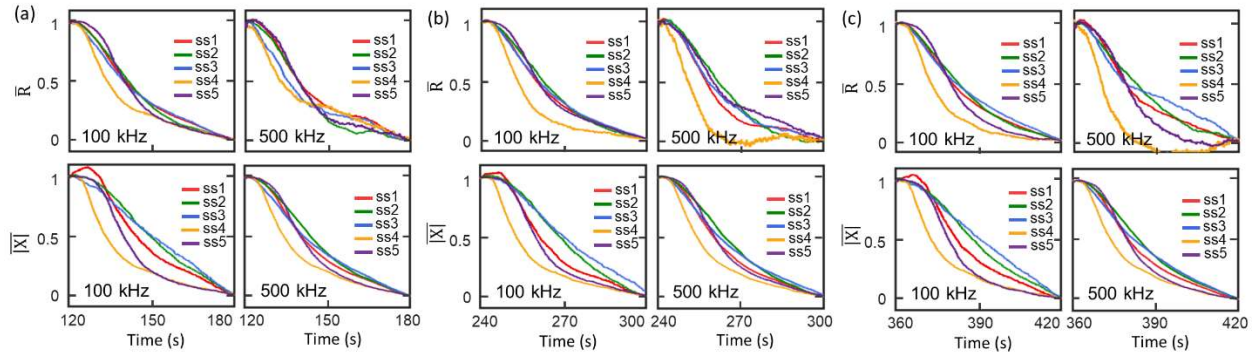

**Figure S-2.** Normalized values of impedance resistance,  $\bar{R}$  and absolute impedance reactance,  $|\bar{X}|$  as a function of time within the (a) second, (b) third and (c) fourth hypoxia session.

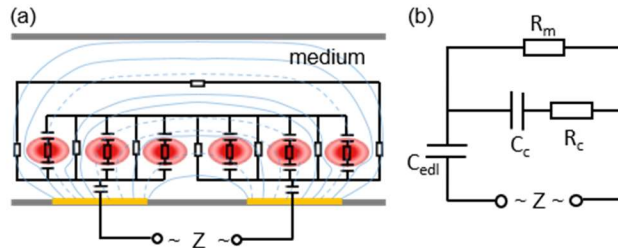

**Figure S-3.** Electrical impedance modelling of sickle cell suspension with (a) a complete equivalent circuit model and (b) a simplified circuit model.
